# Supplementary material for: Iontophoresis mediated localized delivery of liposomal gold nanoparticles for photothermal and photodynamic therapy of acne
Source: Royal Society of Chemistry journal article supplement (doi:10.1039/d0bm01712d), 2021-01-01
Supplement: d0bm01712d1.pdf [file d0bm01712d1.pdf]

## Iontophoresis mediated localized delivery of liposomal gold nanoparticles for photothermal and photodynamic therapy of acne

Syed Baseeruddin Alvi<sup>a</sup>, Rajalakshmi P.S<sup>a</sup>, Anil Jogdand<sup>a</sup>, Ambekar Yogashwari Sanjay<sup>a</sup>, Veeresh B<sup>b</sup>, Renu John<sup>a</sup> and Aravind Kumar Rengan<sup>a\*</sup>

<sup>a</sup>Department of Biomedical Engineering, Indian Institute of Technology Hyderabad, Telangana, India.

<sup>b</sup>Department of Pharmacology, G. Pulla Reddy college of Pharmacy, Mehdipatnam, Hyderabad, Telangana, India.

\* Corresponding Author, E-mail: aravind@bme.iith.ac.in

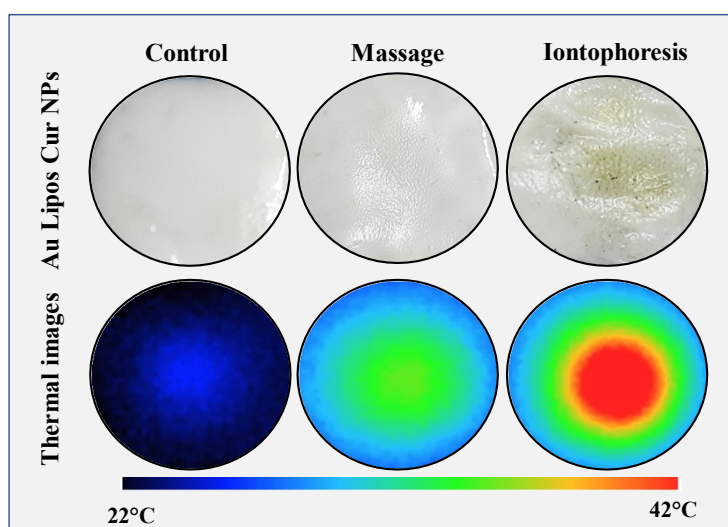

**Figure S1:** *Ex vivo* analysis of localized Au Lipos NPs deposition within skin layer through physical massage and/or iontophoresis mediated delivery which was compared with Au Lipos NPs without iontophoresis (Control).

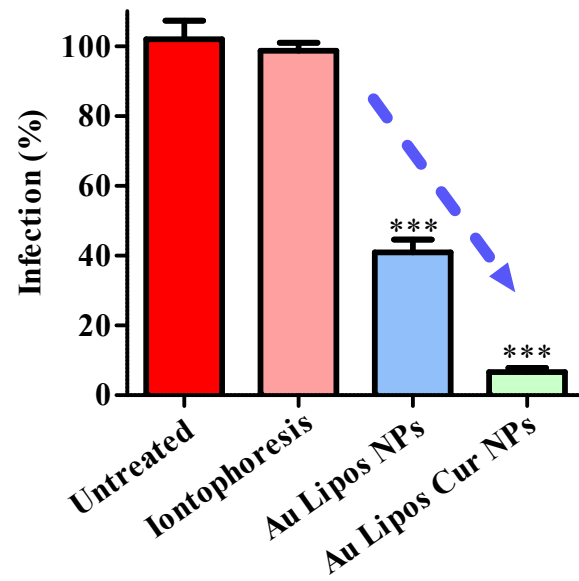

**Figure S2:** Quantification of the area infected in rabbit skin treated with only iontophoresis, Au Lipos NPs and Au Lipos Cur NPs. The blue arrow shows the suppression in the infection. The area of infection was quantified by using ImageJ software. \*\*\* $P < 0.001$  when compared with untreated control.
